# Supplementary material
Source: PubMed Central journal article supplement (PMC9146168)
Supplement: NIHMS1807867-supplement-SI.pdf [file NIHMS1807867-supplement-SI.pdf]

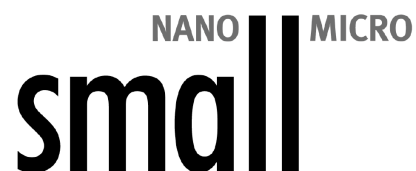

## Supporting Information

for *Small*, DOI: 10.1002/smll.202105857

**Ionically Active MXene Nanopore Actuators**

*Mehrnaz Mojtabavi, Wan-Yu Tsai, Armin  
VahidMohammadi, Teng Zhang, Yury Gogotsi, Nina  
Balke, and Meni Wanunu\**

# Supporting Information

## **Ionic Active MXene Nanopore Actuators**

*Mehrnaz Mojtabavi, Wan-Yu Tsai, Armin Vahid Mohammadi, Teng Zhang, Yury Gogotsi, Nina Balke, and Meni Wanunu*

**Table S1.** List of nanopores used in this study.

| <b>Pore name</b> | <b>Membrane</b>                               | <b>Pore projection area (nm<sup>2</sup>)</b> | <b>Figure</b> |
|------------------|-----------------------------------------------|----------------------------------------------|---------------|
| <b>A</b>         | Ti <sub>3</sub> C <sub>2</sub> T <sub>x</sub> | 32                                           | 1d, S7d       |
| <b>B</b>         | Ti <sub>3</sub> C <sub>2</sub> T <sub>x</sub> | 21                                           | 2a, 2c, S6    |
| <b>C</b>         | Ti <sub>3</sub> C <sub>2</sub> T <sub>x</sub> | 6.7                                          | 2b            |
| <b>D</b>         | Ti <sub>3</sub> C <sub>2</sub> T <sub>x</sub> | 18                                           | S1a, S4b      |
| <b>E</b>         | Ti <sub>3</sub> C <sub>2</sub> T <sub>x</sub> | 16.6                                         | S1b           |
| <b>F</b>         | Ti <sub>3</sub> C <sub>2</sub> T <sub>x</sub> | 28.26                                        | S2, S7b       |
| <b>G</b>         | Ti <sub>3</sub> C <sub>2</sub> T <sub>x</sub> | 51                                           | S3            |
| <b>H</b>         | Ti <sub>3</sub> C <sub>2</sub> T <sub>x</sub> | 16.4                                         | S4a           |
| <b>I</b>         | Ti <sub>3</sub> C <sub>2</sub> T <sub>x</sub> | 16                                           | S7a, S7c      |
| <b>J</b>         | Ti <sub>3</sub> C <sub>2</sub> T <sub>x</sub> | 30                                           | Table S2      |
| <b>K</b>         | Ti <sub>3</sub> C <sub>2</sub> T <sub>x</sub> | 17.5                                         | S8            |
| <b>L</b>         | Ti <sub>2</sub> CT <sub>x</sub>               | 22.2                                         | S9            |
| <b>M</b>         | Ti <sub>2</sub> CT <sub>x</sub>               | 42.2                                         | S9            |
| <b>N</b>         | Ti <sub>2</sub> CT <sub>x</sub>               | 33.4                                         | S9            |
| <b>O</b>         | SiN <sub>x</sub>                              | 51.5                                         | S10           |
| <b>P</b>         | SiN <sub>x</sub>                              | 86.5                                         | S10           |

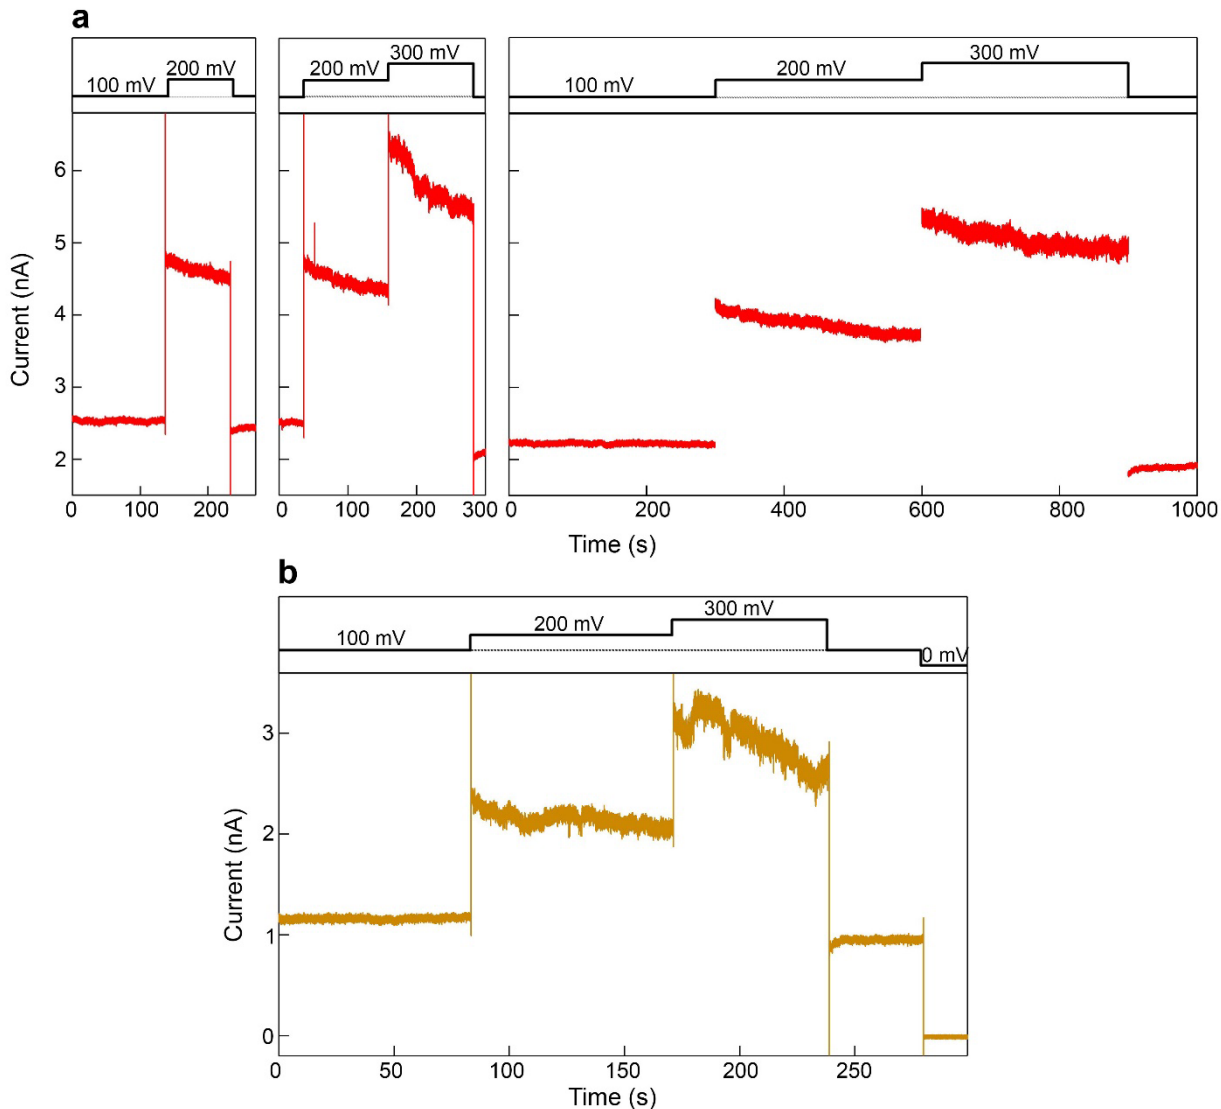

**Figure S1. Actuation property of nanopores in few-layer MXene membranes due to  $\text{Li}^+$  and  $\text{Na}^+$  (de)intercalation.** (a) Current trace of nanopore D demonstrating that by increasing voltage, the nanopore conductance value decreases. By going back to lower voltage values ( $\sim 100$  mV) again, the conductance recovers. This behavior could happen repeatedly as the second and third traces show. Buffer: 0.4 M LiCl, 10 mM Tris pH 7.5. (b) Current trace of nanopore E showing voltage-gated actuation property of the MXene nanopore due to (de)intercalation of  $\text{Na}^+$  ions. Buffer: 0.4 M NaCl, 10 mM Tris, pH 7.5.

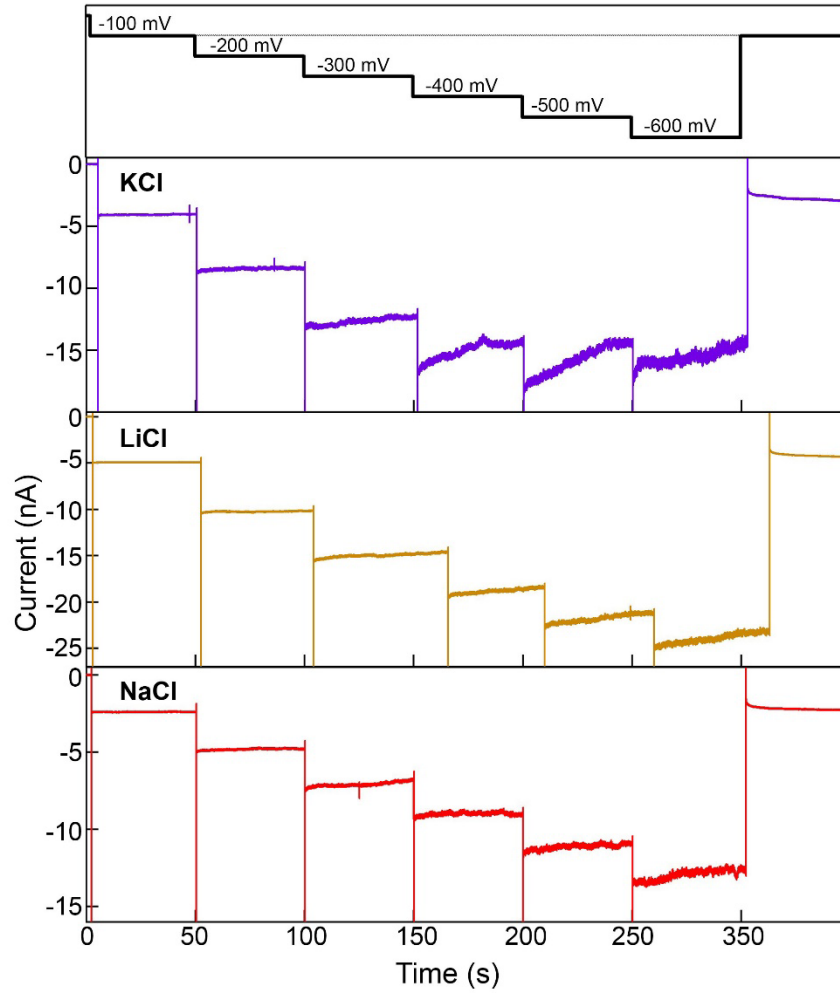

**Figure S2. Actuation property of nanopore F in a few-layer MXene membrane tested with three different cations: potassium (purple), sodium (yellow), and lithium (red). Buffers: 1 M KCl, 10 mM Tris pH 7.5, 1 M NaCl, 10 mM Tris pH 7.5, 1 M LiCl, 10 mM Tris pH 7.5.**

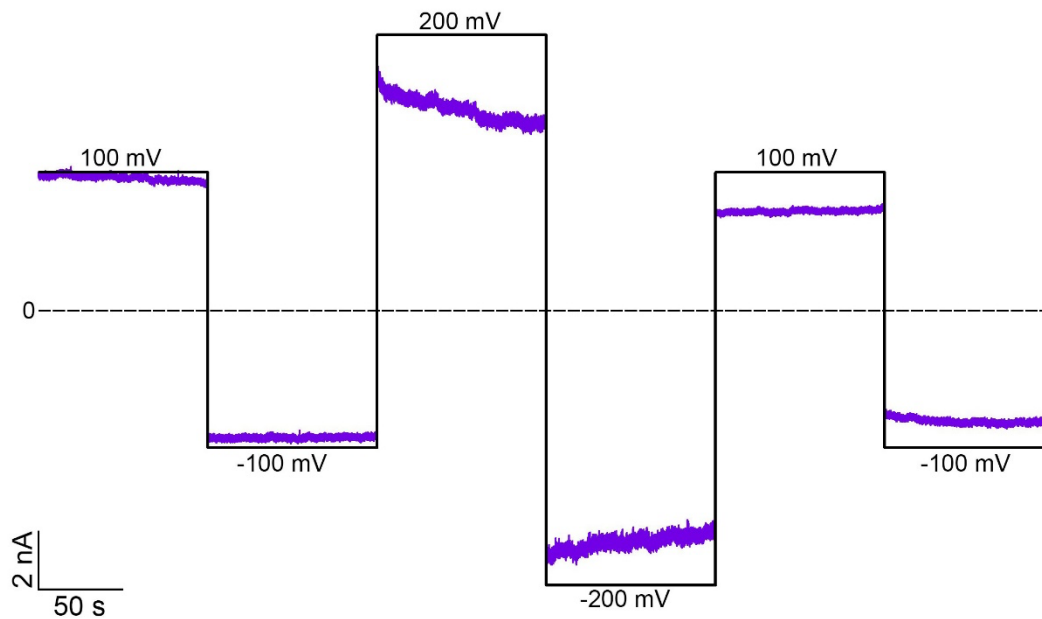

**Figure S3.** Current trace of nanopore G at positive and negative voltages. Buffer: 0.4 M KCl, 20 mM Tris, pH 7.5.

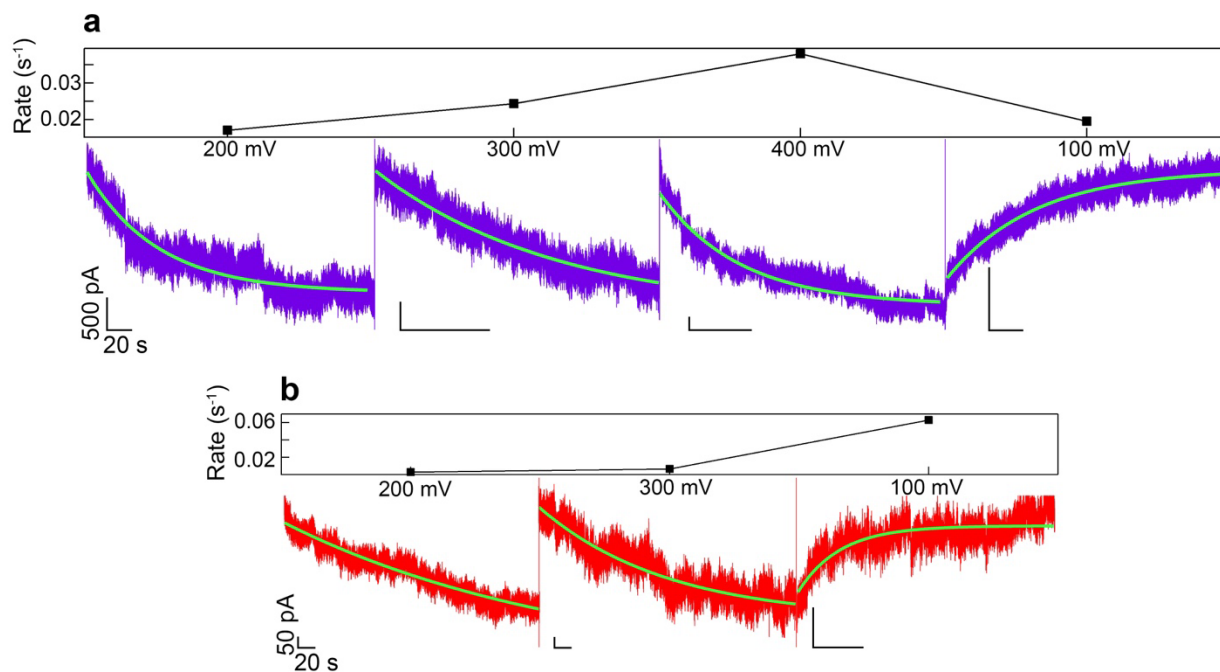

**Figure S4. Rate of cation (de)intercalation between the MXene layers for nanopores H and D.** (a) Single-exponential functions (green curves) fitted to the current trace of nanopore H. Buffer: 0.4 M KCl, 20 mM Tris, pH 7.5. (b) Single-exponential functions (green curve) fitted to the current trace of nanopore D. Buffer: 0.4 M LiCl, 20 mM Tris, pH 7.5.

**Table S2. Rates of conductance changes for 6 MXene nanopores tested in the KCl buffer.** Current traces were fitted to single exponential function:  $I = I_0 e^{\frac{-t}{\tau}}$

| <b>Pore name</b> | <b>Rate at <math>\pm 200</math> mV<br/>(s<sup>-1</sup>)</b> | <b>Rate @ <math>\pm 300</math> mV<br/>(s<sup>-1</sup>)</b> | <b>Rate @ <math>\pm 400</math> mV<br/>(s<sup>-1</sup>)</b> | <b>Rate @ <math>\pm 100</math> mV<br/>(s<sup>-1</sup>)</b> |
|------------------|-------------------------------------------------------------|------------------------------------------------------------|------------------------------------------------------------|------------------------------------------------------------|
| <b><i>B</i></b>  | 0.076                                                       | 0.133                                                      | 0.17                                                       | 0.067                                                      |
| <b><i>H</i></b>  | 0.0171                                                      | 0.0244                                                     | 0.038                                                      | 0.0196                                                     |
| <b><i>F</i></b>  | 0.082                                                       | 0.0137                                                     | 0.0538                                                     | 0.0431                                                     |
| <b><i>G</i></b>  | 0.011                                                       | -                                                          | -                                                          | 0.049                                                      |
| <b><i>J</i></b>  | 0.0127                                                      | -                                                          | -                                                          | 0.0267                                                     |
| <b><i>I</i></b>  | 0.0141                                                      | -                                                          | -                                                          | 0.0264                                                     |



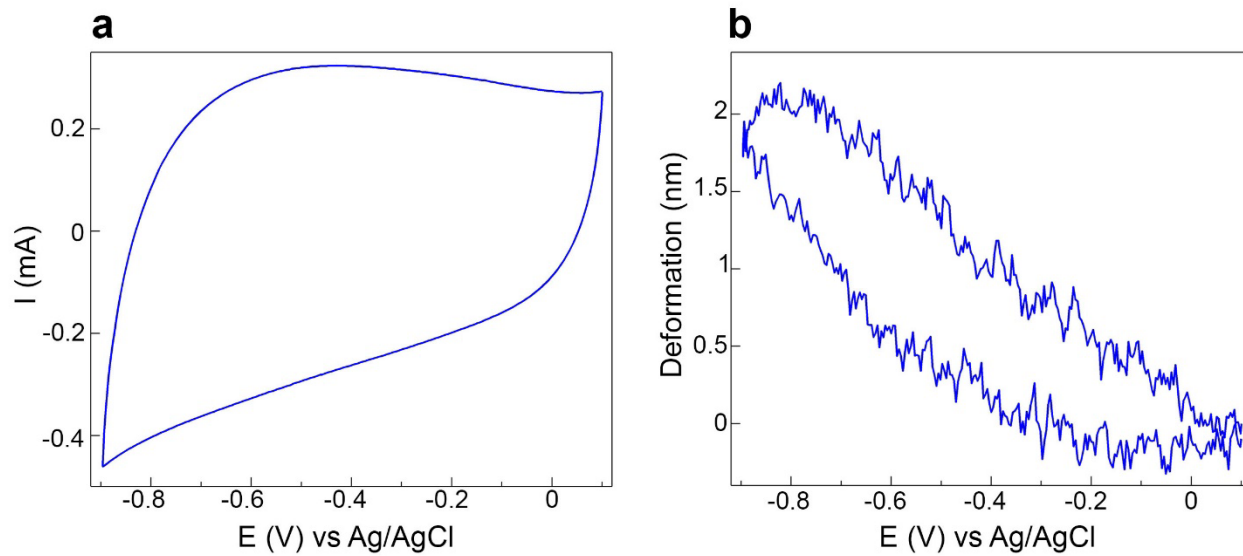

**Figure S5. AFM dilatometry experiment of a deformation in a 16-layer MXene membrane. (a) CV and (b) deformation of a 16-layer MXene film in 0.5 M Li<sub>2</sub>SO<sub>4</sub> at 1 V/s.**

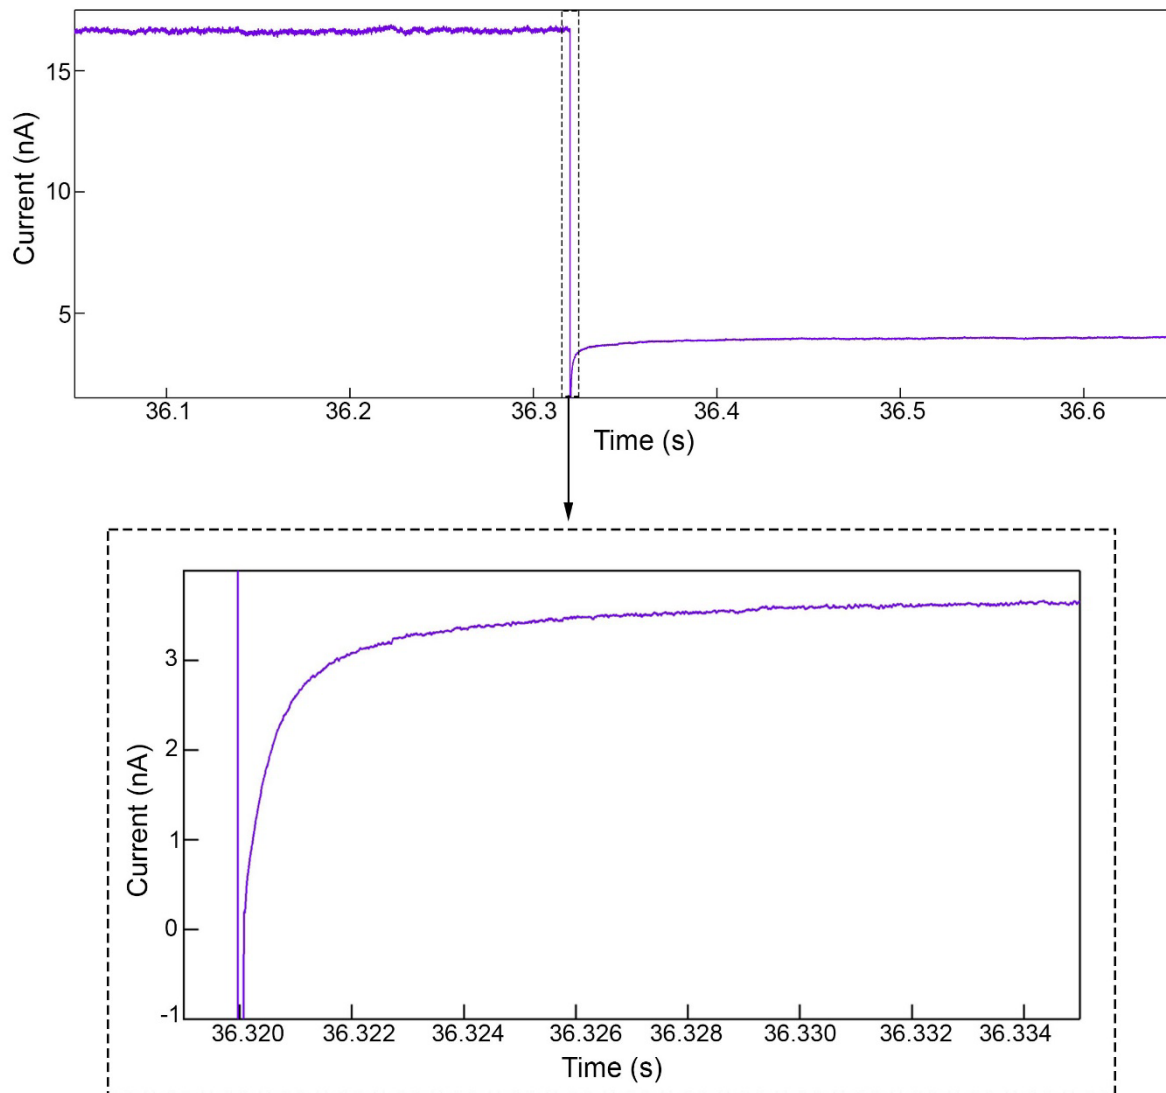

**Figure S6. Capacitive response of nanopore B in millisecond timescale upon changing voltage from 400 mV to 100 mV. Buffer: 0.4 M KCl, 20 mM Tris, pH 7.5.**

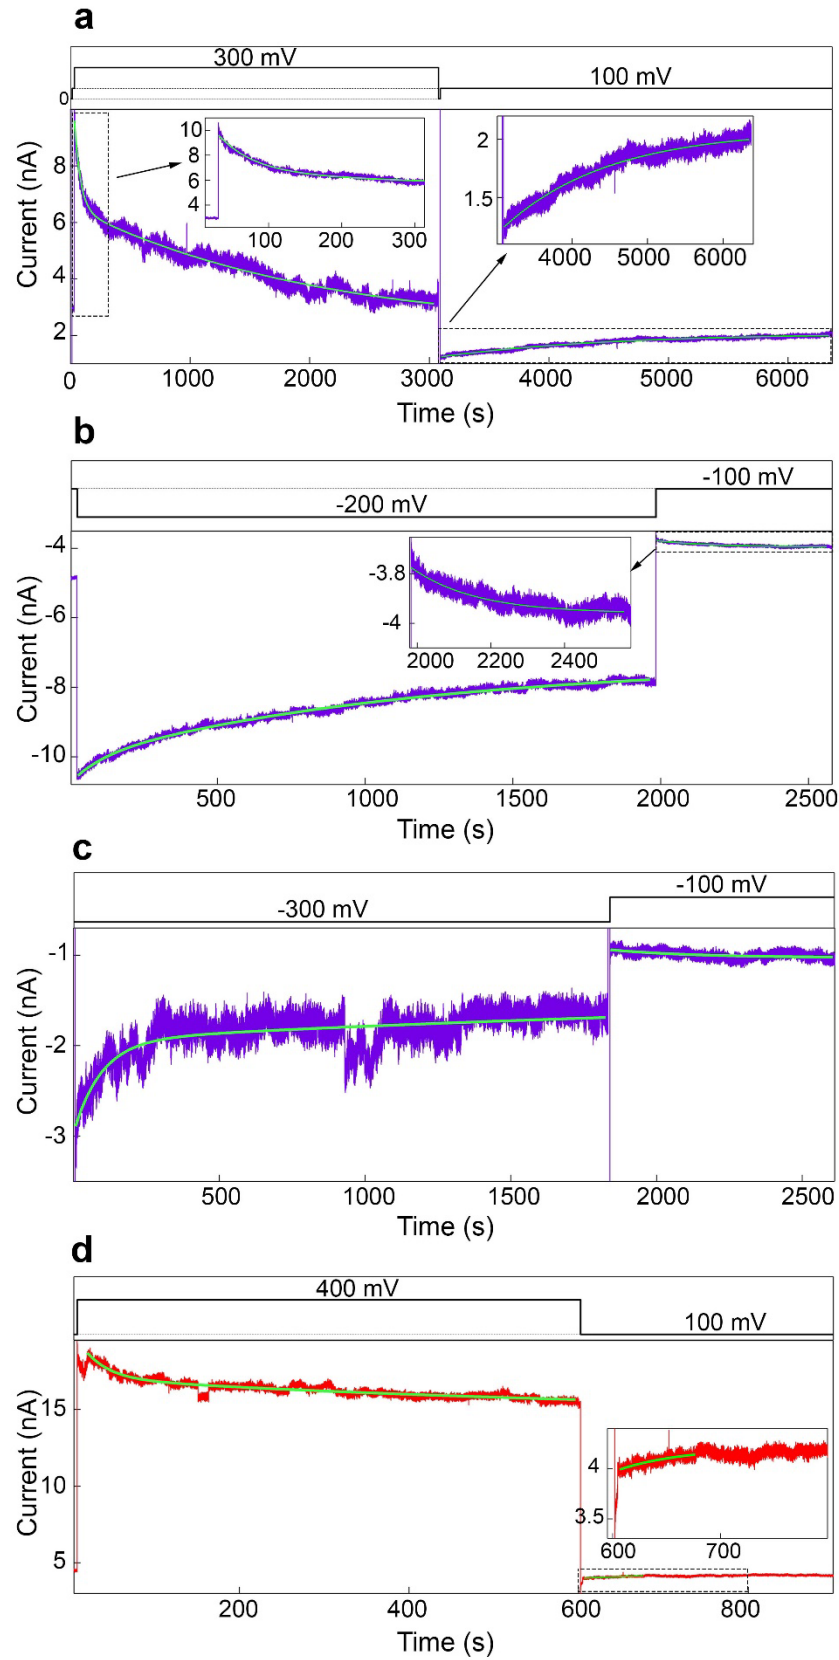

**Figure S7. Current traces of MXene nanopores at  $V > 200$  mV for up to ~3,000 seconds.** (a) Current trace of the nanopore I at 300 mV for ~ 50 minutes. A double exponential function ( $I = I_1 e^{\frac{-t}{\tau_1}} + I_2 e^{\frac{-t}{\tau_2}}$ , green curve) was fitted to the trace with rates of  $\tau_1^{-1} = 0.019 \text{ s}^{-1}$  and  $\tau_2^{-1} = 0.0004 \text{ s}^{-1}$ . This was followed by applying 100 mV for ~ 50 minutes. A single-exponential function was fitted to the trace with rate of  $0.007 \text{ s}^{-1}$ . Buffer: 1 M KCl, 10 mM Tris, pH 7.5 (b) Current trace of nanopore F at -200 mV for ~ 33 minutes. A double exponential function (green curve) was fitted to the trace with rates of  $\tau_1^{-1} = 0.0096 \text{ s}^{-1}$  and  $\tau_2^{-1} = 0.0008 \text{ s}^{-1}$ . This was followed by applying 100 mV for ~ 10 minutes. A single-exponential function was fitted to the trace with rate of  $0.0057 \text{ s}^{-1}$ . Buffer: 1 M KCl, 10 mM Tris, pH 7.5. (c) Current trace of nanopore I at -300 mV for ~ 30 minutes. A double exponential function (green curve) was fitted to the trace with rates of  $\tau_1^{-1} = 0.01 \text{ s}^{-1}$  and  $\tau_2^{-1} = 0.0003 \text{ s}^{-1}$ . This was followed by applying 100 mV for ~ 10 minutes. A single-exponential function was fitted to the trace with rate of  $0.0034 \text{ s}^{-1}$ . Buffer: 1 M KCl, 10 mM Tris, pH 7.5. (d) Current trace of nanopore A at 400 mV for ~ 10 minutes. A double exponential function (green curve) was fitted to the trace with rates of  $\tau_1^{-1} = 0.035 \text{ s}^{-1}$  and  $\tau_2^{-1} = 0.0014 \text{ s}^{-1}$ . This was followed by applying 100 mV for ~ 5 minutes. A single-exponential function was fitted to the trace with rate of  $0.016 \text{ s}^{-1}$ . Buffer: 1 M LiCl, 10 mM Tris, pH 7.5.

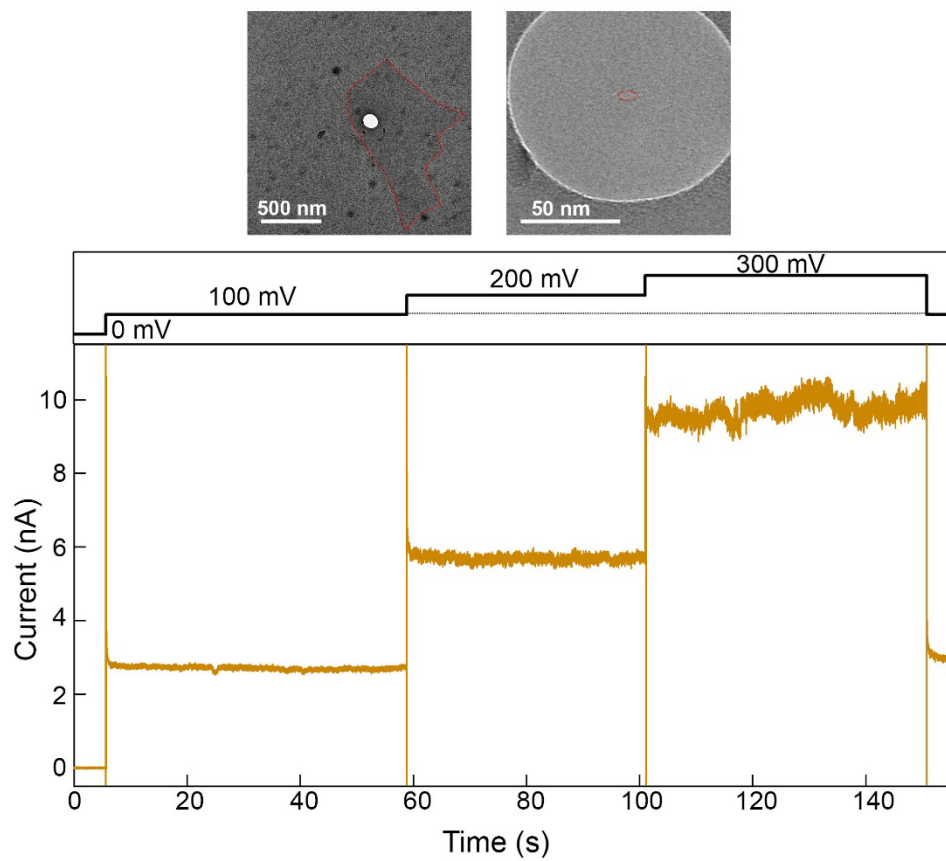

**Figure S8. Current trace of nanopore K fabricated through monolayer MXene membrane showing no actuation behavior.** TEM images of the monolayer MXene membrane and the fabricated nanopore are shown. Based on the contrast in the images, this pore might be a monolayer MXene pore.

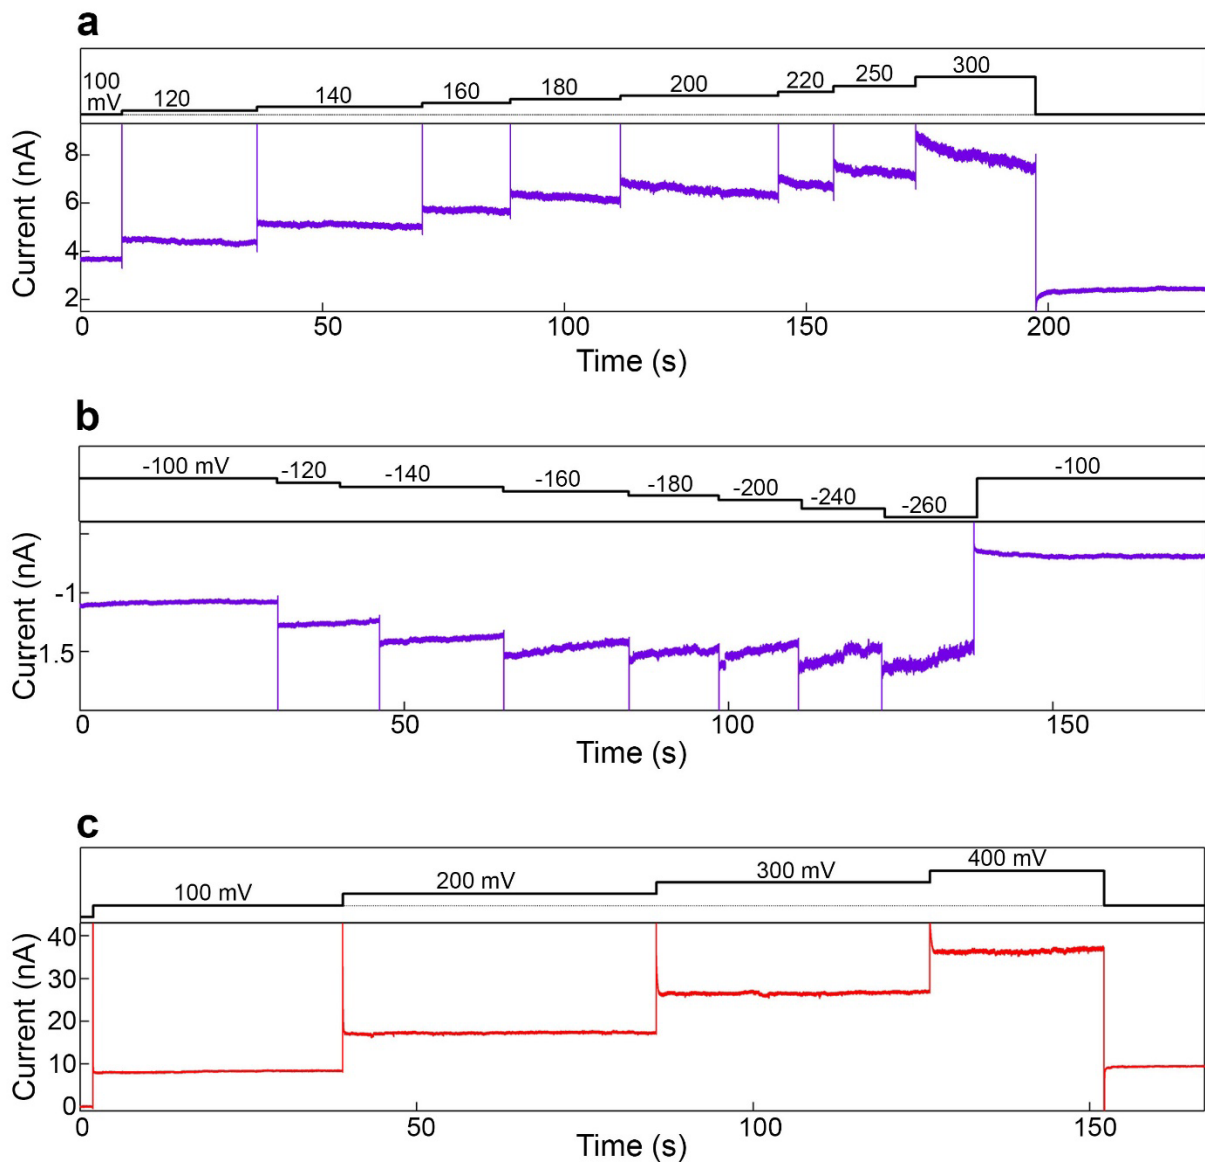

**Figure S9. Current traces of  $\text{Ti}_2\text{CT}_x$  MXene nanopores.** (a-b) Current traces of nanopores L and M showing voltage-gated actuation behavior. Buffer: 0.4 M KCl, 20 mM, Tris pH 7.5 (c) Current trace of nanopore N showing no actuation behavior at high voltages. Buffer: 2 M LiCl, 20 mM Tris, pH 7.5.

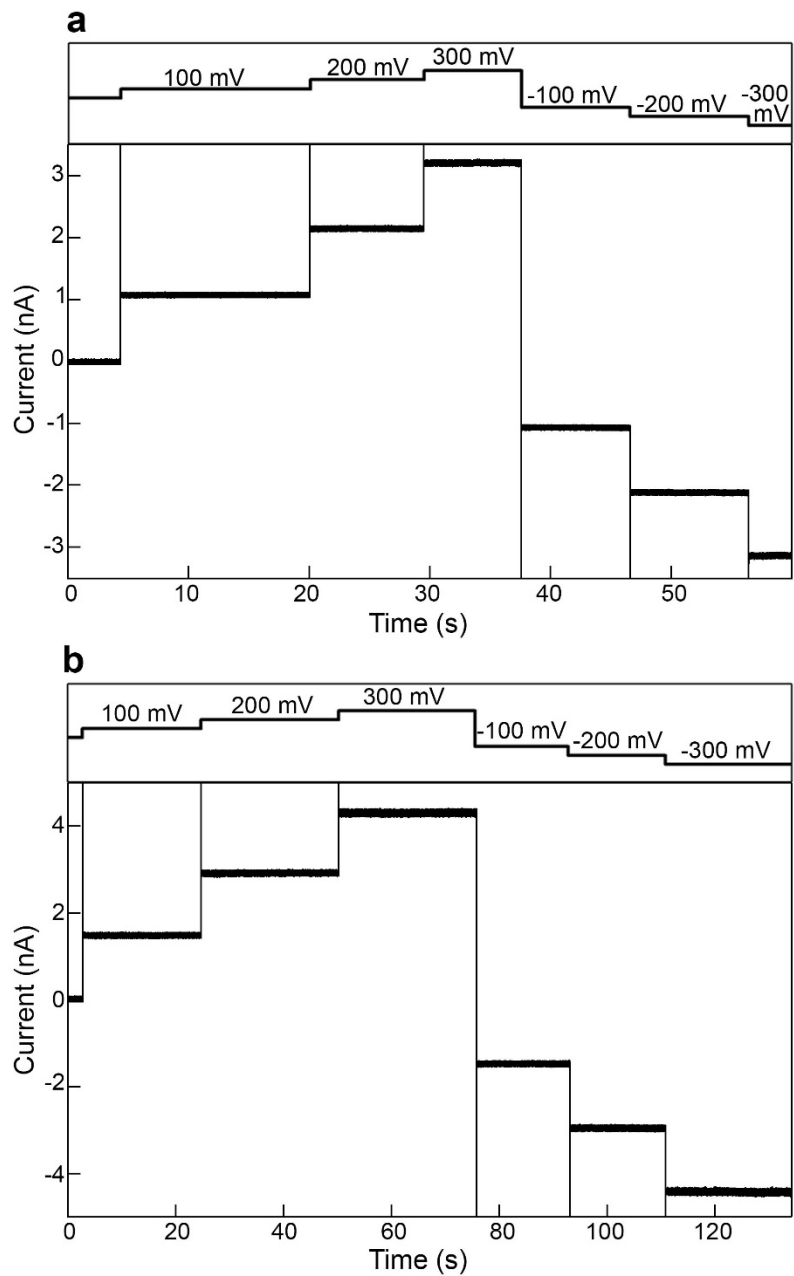

**Figure S10. Current traces of SiN<sub>x</sub> nanopores showing no voltage-gated actuation behavior.** (a) nanopore Q and (b) nanopore P were fabricated through ~ 30 nm SiN<sub>x</sub> free-standing membrane. Buffer: 0.4 M NaCl, 20 mM Tris, pH 7.5.
